# Supplementary material
Source: PubMed Central journal article supplement (PMC5754215)
Supplement: NIHMS916258-supplement-Suplemental_Table.pdf [file NIHMS916258-supplement-Suplemental_Table.pdf]

| <b>Primary antibodies:</b>    |             |                    |              |                      |
|-------------------------------|-------------|--------------------|--------------|----------------------|
| <b>Name</b>                   | <b>Host</b> | <b>Company</b>     | <b>Cat #</b> | <b>Concentration</b> |
| Notch 1                       | Goat        | R&D Systems        | AF1057       | 1:200                |
| Notch 2                       | Rabbit      | Abcam              | AB8926       | 1:500- 1:3000        |
| Notch 3                       | Rabbit      | Abcam              | AB60087      | 1:50- 1:3000         |
| N4 Covance Rb2-2              | Rabbit      | Kitajewski/Shawber |              | 1:200- 1:1000        |
| Jagged 1 extracellular domain | Goat        | R&D Systems        | AF599        | 1:100                |
| Jagged2                       | Goat        | Santa Cruz         | SC-8157      | 1:250                |
| Dll4                          | Goat        | R&D                | AF1389       | 1:100                |
| CD31                          | Rat         | BD Biosciences     | 553370       | 1:200-1:250          |
| Cytokeratin                   | Rabbit      | Dako               | Z0622        | 1:1000               |
| Mct1                          | Chicken     | Millipore          | AB1286-I     | 1:1000               |
| Mct4                          | Rabbit      | Millipore          | AB3314P      | 1:1000               |
| Muc1                          | Rabbit      | Novus Biological   | NB120-15481  | 1:100                |
| Tpbpa                         | Rabbit      | Abcam              | AB104401     | 1:1000-1:1500        |

| <b>Secondary antibodies:</b>        |             |                |              |                      |
|-------------------------------------|-------------|----------------|--------------|----------------------|
| <b>Name</b>                         | <b>Host</b> | <b>Company</b> | <b>Cat #</b> | <b>Concentration</b> |
| Anti-rat-IgG<br>Alexa-Fluor 488     | Donkey      | Invitrogen     | A21208       | 1:800- 1:1000        |
| Anti-rabbit-IgG<br>Alexa-Fluor 488  | Donkey      | Invitrogen     | A21206       | 1:800- 1:1000        |
| Anti-goat-IgG<br>Alexa-Fluor 594    | Donkey      | Invitrogen     | A11058       | 1:800- 1:1000        |
| Anti-rat-IgG<br>Alexa-Fluor 594     | Donkey      | Invitrogen     | A21209       | 1:800- 1:1000        |
| Anti-rabbit-IgG<br>Alexa-Fluor 594  | Donkey      | Invitrogen     | A21207       | 1:800- 1:1000        |
| Anti-chicken-IgG<br>Alexa-Fluor 594 | Donkey      | Invitrogen     | A21207       | 1:000                |
